# Supplementary material for: Magnetothermal microfluidic-directed synthesis of quantum dots
Source: Royal Society of Chemistry journal article supplement (doi:10.1039/d0tc00305k), 2020-01-01
Supplement: d0tc00305k1.pdf [file d0tc00305k1.pdf]

## Supplementary Information

### **Magnetothermal Microfluidic-Directed Synthesis of Quantum Dots**

Rui Cheng, Kangzhe Ma, Hong-Gang Ye, Luting Ling, Guan Wu, Cai-Feng Wang,  
Su Chen\*

State Key Laboratory of Materials-Oriented Chemical Engineering, College of  
Chemical Engineering, Jiangsu Key Laboratory of Fine Chemicals and Functional  
Polymer Materials, Nanjing Tech University (former Nanjing University of  
Technology), Nanjing 210009, China.

Email: [chensu@njtech.edu.cn](mailto:chensu@njtech.edu.cn); Fax: +86-25-83172258; Tel: +86-25-83172258.

**Table S1.** Reaction parameters and emissive wavelength of CdSe QDs synthesized by MMT.

| No. | Temperature (°C) | Flow rate (mL/h) | Emissive wavelength (nm) |
|-----|------------------|------------------|--------------------------|
| 1   | 220              | 25               | 515                      |
| 2   | 230              | 25               | 520                      |
| 3   | 240              | 25               | 528                      |
| 4   | 250              | 25               | 535                      |
| 5   | 200              | 20               | 550                      |
| 6   | 210              | 20               | 573                      |
| 7   | 210              | 15               | 585                      |
| 8   | 220              | 15               | 595                      |
| 9   | 250              | 15               | 625                      |

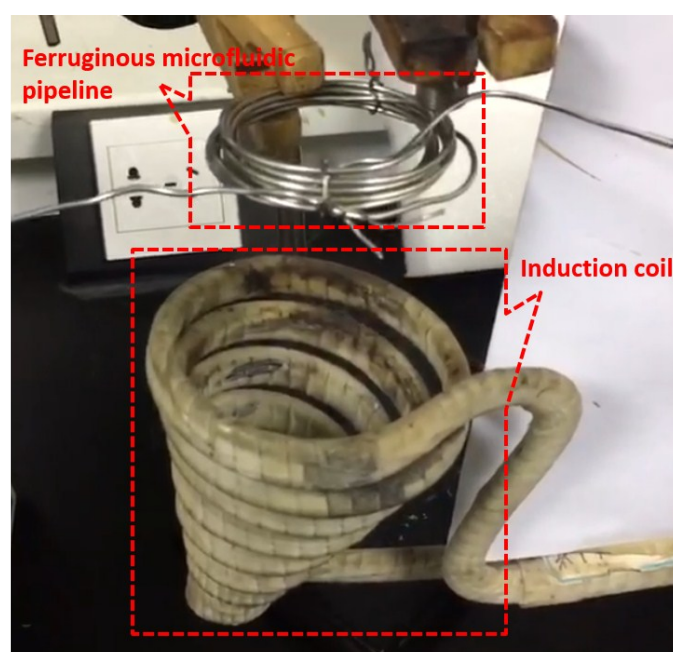

**Fig. S1** Digital photograph of the reaction device.

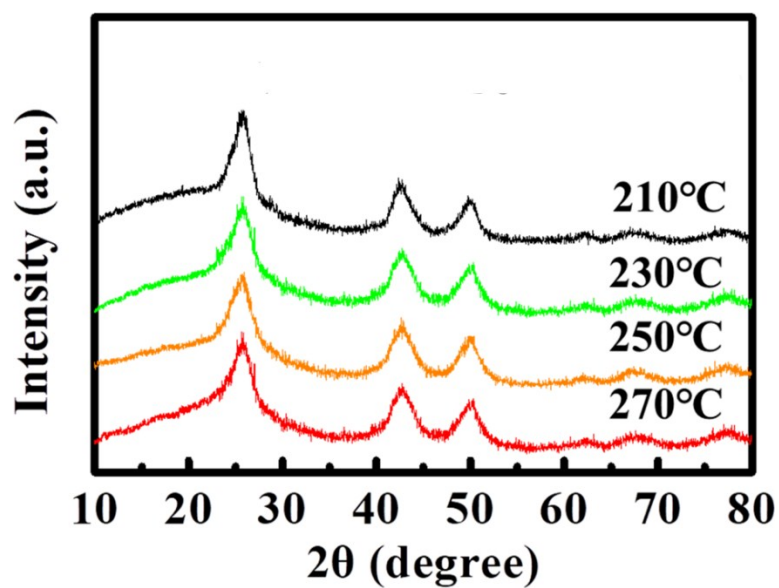

**Fig. S2** XRD patterns of CdSe QDs prepared at different reaction temperatures.

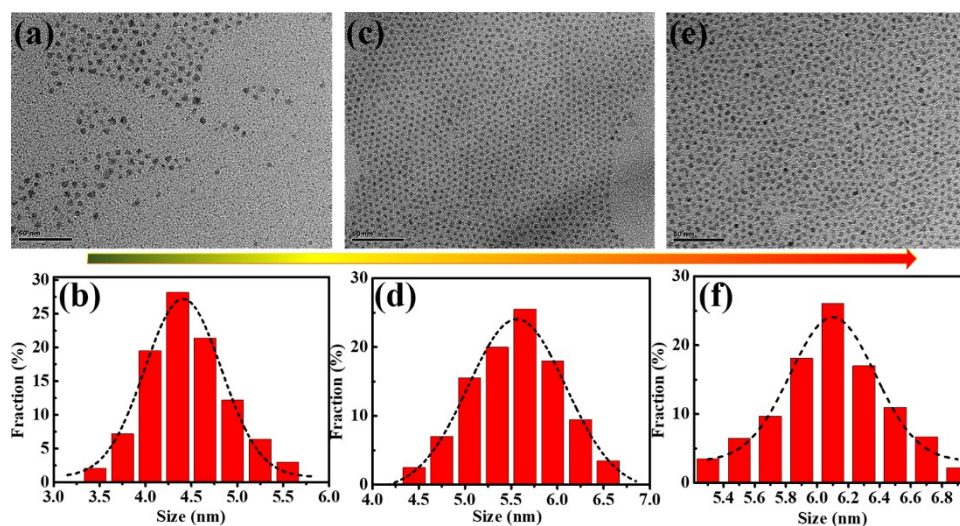

**Fig. S3** TEM images of CdSe QDs with the emissive wavelength of 520 nm (a), 573 nm (c) and 595 nm (e). Size distribution of CdSe QDs with the emissive wavelength of 520 nm (b), 573 nm (d) and 595 nm (f).
